# Supplementary material
Source: HighWire-hosted journal article supplement (https://cmaj.ca/content/suppl/2020/01/29/cmaj.140703)
Supplement: 140703-guide-fr.pdf [file 140703-guide-fr.pdf]

# Recommandations sur le dépistage du cancer de la prostate par le dosage de l'antigène prostatique spécifique

Groupe d'étude canadien sur les soins de santé préventifs\*

■ Citation : *CMAJ* 2014 November 4;186:1225-34. doi : 10.1503/cmaj.140703

Voir le commentaire connexe au [www.cmaj.ca/lookup/doi/10.1503/cmaj.141252](http://www.cmaj.ca/lookup/doi/10.1503/cmaj.141252)

\*Les auteurs sont indiqués à la fin de l'article. La liste complète des membres actuels du Groupe d'étude canadien sur les soins de santé préventifs se trouve à l'adresse <https://canadiantaskforce.ca/a-propos-du-gecssp/membres/?lang=fr>

**L**e cancer de la prostate est, après le cancer de la peau, le type de cancer le plus couramment diagnostiqué chez les hommes et la troisième cause de décès lié à un cancer chez les hommes au Canada<sup>1</sup>. Le risque, au cours d'une vie, de recevoir ce diagnostic de cancer est actuellement de 14,3 %, tandis que le risque, au cours d'une vie, de décéder d'un cancer de la prostate est de 3,6 %<sup>2</sup>. La prévalence, lors d'autopsies, du cancer de la prostate non diagnostiqué est élevée et augmente avec l'âge (> 40 % chez les hommes de 40 à 49 ans et > 70 % chez les hommes de 70 à 79 ans)<sup>3</sup>. La plupart des diagnostics de cancer de la prostate ont un pronostic favorable; le ratio de survie relative à 10 ans est maintenant de 95 %, soit le plus élevé de tous les cancers chez les hommes<sup>1</sup>.

Au Canada, le taux de décès normalisé selon l'âge attribuable à un cancer de la prostate a augmenté de 1969 à 1991, puis a chuté de 37,5 % de 1992 à 2009, à raison d'une moyenne de 2,6 % par année (figure 1). En 1990, la mortalité normalisée selon l'âge était estimée à 30 cas par 100 000; en 2010, il était en deçà de 20 cas par 100 000<sup>1</sup>. Cependant, au cours de la même période, le nombre de cas de cancer de la prostate et l'incidence normalisée selon l'âge ont tous deux augmenté. Après l'introduction et l'adoption du dosage de l'antigène prostatique spécifique (APS), l'incidence du cancer de la prostate a augmenté rapidement à partir de 1990, atteignant son plus haut niveau en 1993. Un second pic, moins marqué, a été observé en 2001 (figure 1). La plus grande partie de cet excès d'incidence représente un surdiagnostic<sup>4,5</sup>, c'est-à-dire la détection de cancers qui n'auraient pas progressé pour causer de symptômes ou de décès<sup>6</sup>.

Aucune donnée probante ne permet de déterminer la proportion de la réduction de la mortalité liée au cancer de la prostate attribuable au dépistage, par rapport à la proportion associée à l'amélioration du traitement ou à d'autres facteurs. Il est probable que le dépistage et le traitement y ont con-

## POINTS CLÉS

- La prévalence de cancer de la prostate non diagnostiqué découvert lors d'autopsies est élevée et augmente avec l'âge (de > 40 % chez les hommes de 40 à 49 ans à > 70 % chez les hommes de 70 à 79 ans).
- Seul un petit pourcentage d'hommes atteints d'un cancer de la prostate présentent des symptômes ou vont en mourir; la plupart des cancers de la prostate évoluent lentement et ne menacent pas le pronostic vital.
- Le dépistage par le dosage de l'antigène prostatique spécifique (APS) pourrait entraîner une légère réduction de la mortalité liée au cancer de la prostate, mais aucune réduction de la mortalité toutes causes confondues.
- Des valeurs seuil d'APS de 2,5 à 4,0 ng/mL sont couramment utilisées aux fins de dépistage; des valeurs seuils inférieures augmentent le risque de résultats faux positifs et aucun seuil ne permet d'écartier complètement le cancer de la prostate.
- Les préjudices associés au dépistage par le dosage de l'APS (p. ex. saignement, infection, incontinence urinaire, résultat faux positif et surdiagnostic) sont courants.
- Le dosage de l'APS ne doit pas être utilisé sans avoir une discussion approfondie avec le patient, idéalement en se servant de ressources d'aides à la prise de décision pour faciliter la compréhension.

tribué<sup>7</sup>. Si le dépistage par le dosage de l'APS était le principal facteur de réduction de la mortalité, l'augmentation abrupte de l'incidence des cas détectés précocement aurait dû être suivie d'une chute correspondante de la mortalité. Or, la réduction de la mortalité liée au cancer de la prostate s'est avérée relativement stable au fil du temps et a débuté trop tôt après l'introduction du test pour être principalement attribuable au dosage de l'APS<sup>7-10</sup>.

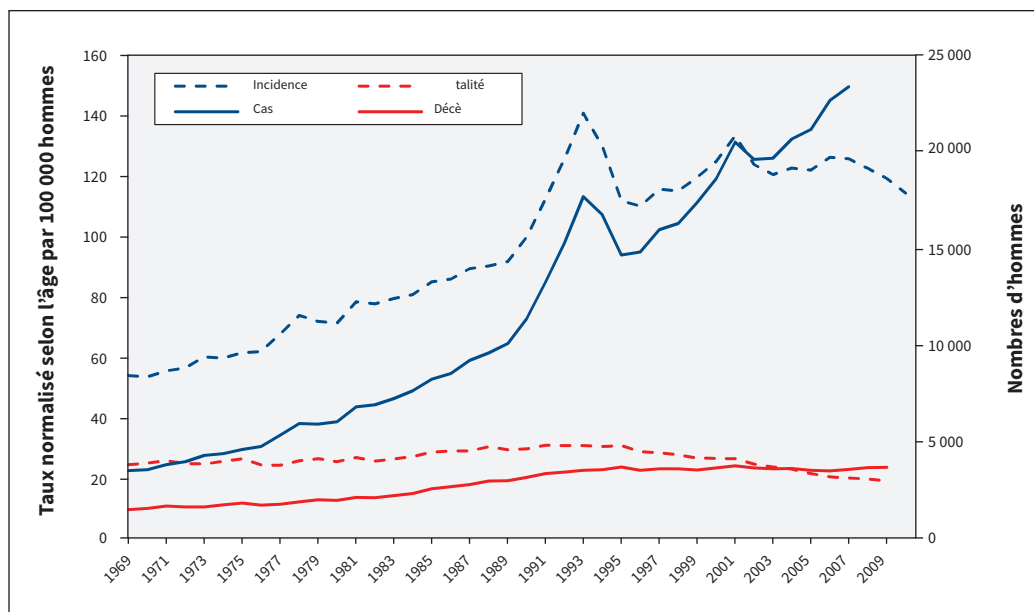

Figure 1: Cas de cancer de la prostate et de décès lié au cancer de la prostate, et incidence et mortalité normalisées selon l'âge (par 100 000 hommes), chez les Canadiens de 45 ans ou plus. L'âge a été normalisé selon la population canadienne de 1991. Les données sur l'incidence n'étaient pas disponibles pour le Québec de 2008 à 2010; par conséquent, le dénominateur de population utilisé pour l'incidence normalisée selon l'âge a été ajusté et le nombre de cas pour 2008 à 2010 a été omis. Les données sur la mortalité n'étaient disponibles que jusqu'en 2009.

Ces lignes directrices présentent des recommandations sur le dépistage du cancer de la prostate par le dosage de l'APS, avec ou sans toucher rectal, chez les hommes de la population générale. Il s'agit d'une révision des lignes directrices précédentes publiées par le Groupe d'étude canadien sur les soins de santé préventifs en 1994<sup>11</sup>.

## Méthodologie

Le Groupe d'étude canadien sur les soins de santé préventifs est un groupe d'experts indépendant formé de cliniciens et de spécialistes de la méthodologie qui élabore bénévolement des recommandations sur les interventions cliniques visant la prévention primaire et secondaire ([www.canadiantaskforce.ca](http://www.canadiantaskforce.ca)). Chaque ensemble de recommandations est établi par un groupe de travail composé de 2 à 6 membres du Groupe d'étude canadien. Chaque groupe de travail détermine les questions de recherche et le cadre d'analyse des lignes directrices. Pour plus d'information sur la méthodologie utilisée par le Groupe d'étude canadien, consultez d'autres publications<sup>12</sup> et son site Web (<http://canadiantaskforce.ca/methods/methods-manual/>).

L'élaboration de ces recommandations a été dirigée par un groupe de travail formé de 6 membres du Groupe d'étude canadien et de personnel scientifique de l'Agence de la santé publique du Canada. L'élaboration des lignes directrices était fondée sur un cadre analytique (annexe 1, accessible en ligne à l'adresse [www.cmaj.ca/lookup/suppl/doi:10.1503/cmaj.140703/-/DC1](http://www.cmaj.ca/lookup/suppl/doi:10.1503/cmaj.140703/-/DC1)) établissant l'objectif global et le contexte des lignes directrices, encadrant l'examen de la documentation et

résumant les questions de recherche clés et contextuelles. Avant l'élaboration des lignes directrices, le cadre d'analyse a été révisé par tous les membres du Groupe d'étude canadien, ainsi que par des parties prenantes externes possédant une expertise à l'échelle nationale et internationale en matière de cancer de la prostate. Les questions clés et contextuelles du cadre d'analyse portaient sur les bénéfices et préjudices associés au dépistage par le dosage de l'APS, avec ou sans toucher rectal, ainsi que les bénéfices et préjudices associés au traitement du cancer de la prostate quant à la réduction de la mortalité liée au cancer de la prostate ou à toutes causes confondues.

Le Centre d'analyse et de synthèse des données probantes de l'Université McMaster (Hamilton, Ontario) a effectué une revue systématique des données probantes disponibles avec l'aide d'un urologue, qui a agi à titre de conseiller technique indépendant, et de personnel scientifique de l'Agence de la santé publique du Canada<sup>13</sup>. La revue systématique s'est déroulée conformément au protocole définitif revu par les pairs (<http://canadiantaskforce.ca/perch/resources/ctfphc-prostate-cancer-screening-protocol.pdf>) du cadre d'analyse et a suivi les méthodes décrites dans le manuel de procédures<sup>14</sup>. Le Preventive Services Task Force des États-Unis ayant déjà recensé les données publiées avant 2007, la période de revue des bénéfices associés au dépistage a été prolongée du 1<sup>er</sup> janvier 2007 au 30 novembre 2013. La recherche des données sur les préjudices a couvert la période de 2003 au 30 novembre 2013. La période de revue des traitements s'est étendue du 1<sup>er</sup> janvier 2007 au 30 novembre 2012. La recension

a été mise à jour au 15 août 2014 pour tenir compte des études admissibles faisant état d'un suivi prolongé. Les recherches ont été effectuées dans les bases de données PubMed, Ovid MEDLINE et MEDLINE, dans le registre central Cochrane des essais comparatifs et la base de données des revues systématiques Cochrane. La méthodologie et les résultats de la revue systématique<sup>13</sup> peuvent être consultés au [www.canadiantaskforce.ca](http://www.canadiantaskforce.ca). Le Groupe d'étude canadien a utilisé le système GRADE (*Grading of Recommendations Assessment, Development and Evaluation*) pour déterminer la qualité des données probantes et la force des recommandations (voir l'encadré 1)<sup>15</sup>. Le protocole, la revue systématique et les lignes directrices ont été soumis à un examen externe par des experts universitaires et cliniques du domaine.

## Bénéfices associés au dépistage par le dosage de l'APS

Un résumé des données décrites dans cette section se trouve à l'annexe 2 (accessible en ligne à l'adresse [www.cmaj.ca/lookup/suppl/doi:10.1503/cmaj.140703/-/DC1](http://www.cmaj.ca/lookup/suppl/doi:10.1503/cmaj.140703/-/DC1)). La revue systématique comprend des tableaux détaillés<sup>13</sup>.

La recension des études effectuée dans le cadre de la revue systématique a permis de relever 6 études contrôlées randomisées (ECR)<sup>16-21</sup>. Étant donné que 3 des études<sup>16-18</sup> étaient considérées comme présentant un risque élevé de biais, les données probantes de ces études n'ont pas été retenues aux fins des présentes lignes directrices. Aucune des études exclues ne montrait de bénéfices associés au dépistage du cancer de la prostate. Les résultats de tous les centres participant à l'Étude européenne randomisée de dépistage du cancer de la prostate (ERSPC)<sup>19</sup>, une étude multinationale, ont été pris en considération au moment de formuler les recommandations.

L'étude ERSPC a mis en évidence une petite réduction de la mortalité absolue liée au cancer de la prostate<sup>19</sup>. Les chercheurs ont constaté une réduction du risque de décès lié au cancer de la prostate dans le groupe soumis au dépistage (risque relatif [RR] 0,79; intervalle de confiance [IC] à 95% de 0,69 à 0,91; réduction du risque absolu 0,128% ou 13 vies sauvées par 10000 hommes invités à passer le test de dépistage), le taux de dépistage par le dosage de l'APS avant l'étude étant de 20%<sup>13,19</sup>. Cependant, il y avait hétérogénéité entre les centres. En effet, certains centres ont obtenu une réduction de la mortalité grâce au dépistage alors que d'autres non.

Par contre, l'étude PLCO (*Prostate, Lung, Colorectal, and Ovarian Cancer Screening Trial*) n'a dégagé aucun effet du dépistage sur la mortalité liée au cancer de la prostate (RR 1,09; IC à 95% de 0,87 à 1,36; 0 décès lié au cancer de la prostate évité par 10000 hommes invités à passer le test de dépistage)<sup>21</sup>. Le pourcentage de participants à l'étude PLCO ayant subi le dosage de l'APS avant l'étude était élevé (52%), mais l'analyse de sensibilité n'a exposé aucun effet de ce test sur les résultats. Toutefois, des taux élevés de dépistage opportuniste par le dosage de l'APS ont été observés dans le groupe témoin, ce qui a diminué les chances de démontrer un bénéfice associé au dépistage. Pour cette raison, bien que l'étude PLCO réduise la confiance en un véritable bénéfice associé au dépistage par le dosage de l'APS sur la mortalité par cancer de la prostate, le groupe de travail a accordé relativement plus de poids aux résultats de l'étude ERSPC.

Aucun effet mesurable du dépistage par le dosage de l'APS sur la mortalité toutes causes confondues n'est ressorti de l'étude PLCO ni de l'étude ERSPC (tableau 1)<sup>13,15,19,21</sup>.

Traditionnellement, le toucher rectal est utilisé pour le dépistage du cancer de la prostate, mais aucune étude n'a évalué les bénéfices de cette méthode employée seule sur la

### Encadré 1 : Classification des recommandations

- Les recommandations sont classées selon le système GRADE (*Grading of Recommendations Assessment, Development and Evaluation*)<sup>15</sup>. Le système GRADE propose 2 niveaux de recommandation — forte et faible. La force des recommandations repose sur la qualité des données probantes à l'appui; le degré d'incertitude quant à l'écart entre les effets désirables et les effets indésirables; le degré d'incertitude ou la variabilité quant aux valeurs et aux préférences; et le degré d'incertitude quant au fait que l'intervention représente une utilisation judicieuse des ressources.
- Une recommandation est forte si le groupe de travail est convaincu que les effets désirables d'une intervention l'emportent sur les effets indésirables (forte recommandation en faveur d'une intervention) ou que les effets indésirables d'une intervention l'emportent sur les effets désirables (forte recommandation à l'encontre d'une intervention). Une forte recommandation sous-entend que la plupart des personnes bénéficieraient de la mesure recommandée.
- Une recommandation est faible si les effets désirables l'emportent probablement sur les effets indésirables (recommandation faible en faveur d'une intervention) ou dont les effets indésirables l'emportent probablement sur les effets désirables (recommandation faible à l'encontre d'une intervention), mais dont le degré d'incertitude est appréciable. Une recommandation faible sous-entend que la plupart des hommes seraient en faveur de la mesure recommandée, mais que bon nombre d'entre eux ne le seraient pas. Les cliniciens doivent donc reconnaître que le choix approprié sera différent d'une personne à l'autre et aider chaque patient à prendre une décision en matière de gestion des soins qui corresponde à ses valeurs et à ses préférences. L'établissement des politiques concernant cette intervention nécessitera un débat de fond et la participation de diverses parties prenantes. Des recommandations faibles sont formulées lorsque l'écart entre les effets désirables et les effets indésirables est petit, la qualité des données probantes est plus faible ou la variabilité quant aux valeurs et aux préférences des patients est marquée.
- Les données probantes sont classées comme étant de qualité élevée, modérée, faible, ou très faible, selon la probabilité que la recherche ultérieure change notre niveau de confiance dans l'estimation des effets.

Tableau 1 : Preuves des bénéfices associés au dépistage du cancer de la prostate par le dosage de l'APS

| Étude (pays)                                                                         | Caractéristiques de l'étude                                                                                                     | Seuils d'APS, ng/mL             | Contamination (taux de dépistage dans les groupes témoins), % | Mortalité liée au cancer de la prostate, RR (IC 95 %)            | Mortalité toutes causes confondues, RR (IC 95 %)                 | Effet absolu                                              | Qualité des données probantes GRADE |
|--------------------------------------------------------------------------------------|---------------------------------------------------------------------------------------------------------------------------------|---------------------------------|---------------------------------------------------------------|------------------------------------------------------------------|------------------------------------------------------------------|-----------------------------------------------------------|-------------------------------------|
| PLCO <sup>21</sup> (États-Unis)                                                      | ERC; 76 693 hommes de 55 à 74 ans; dosage annuel de l'APS pendant 6 ans et toucher rectal annuel pendant 4 ans; suivi de 14 ans | 4,0                             | 52                                                            | 1,09 (0,87–1,36)                                                 | 0,96 (0,93–1,00)                                                 | Aucun effet                                               | Modérée                             |
| ERSPC <sup>19</sup> (Finlande, Suède, Italie, Pays-Bas, Belgique, Espagne et Suisse) | ERC; 162 243 hommes de 50 à 74 ans; (groupe principal de 55 à 69 ans); dosage de l'APS tous les 4 ans; suivi de 13 ans          | 3,0 dans la plupart des centres | 20                                                            | Groupe principal: 0,79 (0,69–0,91)<br>Tout âge: 0,83 (0,73–0,94) | Groupe principal: 1,00 (0,98–1,02)<br>Tout âge: 1,00 (0,98–1,02) | 12,8 décès de moins par 10 000 hommes soumis au dépistage | Modérée                             |

Note : APS = antigène prostatique spécifique, ECR = étude contrôlée randomisée, ERSPC = Étude européenne randomisée de dépistage du cancer de la prostate, IC = intervalle de confiance, PLCO = *Prostate, Lung, Colorectal, and Ovarian Cancer Screening Trial* (sur le dépistage du cancer colorectal et des cancers de la prostate, du poumon et de l'ovaire), RR = risque relatif.

\*Le système GRADE (*Grading of Recommendations, Assessment, Development and Evaluation*)<sup>15</sup> divise le continuum de la qualité des données probantes en 4 catégories : élevée, moyenne, faible ou très faible; voir la synthèse des données probantes pour l'évaluation complète de la qualité des études<sup>13</sup>.

mortalité<sup>22</sup>. Tous les participants à l'étude PLCO ont été soumis au dosage de l'APS et au toucher rectal. En revanche, certains centres participant à l'étude ERSPC ont eu recours au dosage de l'APS comme principal test de dépistage, suivi du toucher rectal selon les résultats obtenus avec la première méthode. D'autres centres ont utilisé les 2 méthodes pour le dépistage initial, mais ont abandonné le toucher rectal par la suite. D'après la revue systématique effectuée aux fins des présentes lignes directrices, rien n'indique que le toucher rectal réduise la mortalité lorsqu'il est utilisé conjointement au dosage de l'APS<sup>13</sup>.

## Préjudices associés au dépistage

Les préjudices associés au dépistage par le dosage de l'APS concernent la détection et le traitement du cancer de la prostate chez les hommes qui obtiennent des résultats vrais positifs ou faux positifs et chez les hommes dont le cancer de la prostate, s'il n'avait pas été trouvé, n'aurait causé ni symptôme ni décès (sur-diagnostic) (tableau 2)<sup>13,15,19,21</sup>.

### Résultats faux positifs

Le taux de résultats faux positifs varie selon la valeur seuil utilisée pour le dosage de l'APS, allant de 11,3 % de tous les hommes évalués à un seuil de 4,0 ng/mL jusqu'à 19,8 % à un seuil de 3,0 ng/mL<sup>23,24</sup>. La valeur seuil utilisée dans l'étude PLCO était de 4,0 ng/mL (dépistage annuel), et la plupart des centres participant à l'étude ERSPC ont utilisé une valeur seuil de 3,0 ng/mL (dépistage tous les 4 ans). Des valeurs seuil inférieures peuvent faire augmenter le nombre de cas de cancer détectés, mais aussi

le risque de résultats faux positifs et de diagnostic de tumeurs indolentes sans signification clinique. Aucun taux d'APS ne permet d'écartier un diagnostic de cancer de la prostate<sup>25,26</sup>. L'infection urinaire et l'hypertrophie bénigne de la prostate sont d'autres facteurs qui augmentent le risque de résultats faux positifs au dosage de l'APS.

### Préjudices associés à la biopsie

Les hommes qui obtiennent un résultat positif au dosage de l'APS sont généralement invités à passer d'autres examens, ce qui comprend habituellement une biopsie de la prostate. Selon la valeur seuil d'APS et la fréquence du dépistage choisies, les hommes qui se soumettent au dépistage par un dosage de l'APS pourraient subir plusieurs biopsies au fil du temps, ce qui augmente le risque de préjudices.

Les préjudices associés à la biopsie de la prostate sont l'hématurie, l'infection, l'hospitalisation et le décès. D'après des études d'observation, on estime que 31 % des hommes (310 hommes pour 1000) ont présenté une hématurie jusqu'à 30 jours après la biopsie et que 0,9 % des hommes (9 hommes pour 1000) ont contracté une infection<sup>13</sup>. Quant aux complications graves, une méta-analyse a montré que l'hospitalisation a été nécessaire chez 21 hommes pour 1000 (2,1 %; IC à 95 % de 1,6 à 2,5 %) et que le décès est survenu chez 2 hommes pour 1000 (0,2 %; IC à 95 % de 0,1 à 0,2 %) (tableau 2)<sup>13</sup>.

### Surdiagnostic

Il y a surdiagnostic lorsque le cancer est détecté correctement, mais que celui-ci, s'il n'avait pas été trouvé, n'aurait pas causé de

Tableau 2 : Données probantes sur les préjudices associés au dosage de l'APS pour le dépistage du cancer de la prostate\*

| Préjudices                       | Type d'étude                                                                                                        | Caractéristiques de l'étude                                          | Proportion (IC à 95 %)                                                                                                                                              | Qualité des données probantes GRADE† |
|----------------------------------|---------------------------------------------------------------------------------------------------------------------|----------------------------------------------------------------------|---------------------------------------------------------------------------------------------------------------------------------------------------------------------|--------------------------------------|
| Surdiagnostic‡                   | Données de modélisation de l'étude ERSPC <sup>19</sup> ; sources diverses                                           |                                                                      | De 40 à 56 % des cas diagnostiqués                                                                                                                                  | Très faible                          |
| Résultat faux positif            | Étude ERSPC <sup>19</sup> ; étude d'observation non contrôlée                                                       | Taux d'APS > 3,0 ng/mL<br>Comme valeur seuil pour demande de biopsie | 19,82 % (11,51–28,13 %) des hommes soumis au dépistage                                                                                                              | Très faible                          |
|                                  | Étude ERSPC <sup>19</sup> et volet d'intervention de l'Étude PLCO <sup>21</sup> ; étude d'observation non contrôlée | Taux d'APS > 4,0 ng/mL<br>Comme valeur seuil pour demande de biopsie | 11,30 % (9,92–12,67 %) des hommes soumis au dépistage                                                                                                               | Très faible                          |
| Préjudices associés à la biopsie | Étude d'observation non contrôlée                                                                                   | < 30 jours après la biopsie                                          | Hématurie§ = moyenne de 30,86 % (20,18–41,51 %) des hommes ayant subi une biopsie<br>Infection§ = moyenne de 0,94 % (0,01–1,86 %) des hommes ayant subi une biopsie | Très faible                          |
|                                  |                                                                                                                     |                                                                      | Hospitalisation = moyenne de 2,07 % (1,59–2,54 %) des hommes ayant subi une biopsie                                                                                 | Très faible                          |
|                                  |                                                                                                                     |                                                                      | Décès = moyenne de 0,17 % (0,09–0,25 %) des hommes ayant subi une biopsie                                                                                           | Très faible                          |

Note : APS = antigène prostatique spécifique, ERSPC = Étude européenne randomisée de dépistage du cancer de la prostate, IC = intervalle de confiance, PLCO = *Prostate, Lung, Colorectal, and Ovarian Cancer Screening Trial* (sur le dépistage du cancer colorectal et des cancers de la prostate, du poumon et de l'ovaire).

\*Toutes les données se trouvent dans l'article de Dunfield et al<sup>13</sup>.

†Le système GRADE (*Grading of Recommendations, Assessment, Development and Evaluation*)<sup>15</sup> divise le continuum de la qualité des données probantes en 4 catégories : élevée, moyenne, faible ou très faible; voir la synthèse des données probantes pour l'évaluation complète de la qualité des études<sup>13</sup>.

‡Surdiagnostic = détection de cancers qui n'auraient pas évolué vers l'apparition de symptômes ou le décès.

§Ne nécessitant pas d'hospitalisation.

symptômes ni le décès du patient. La fréquence estimée du surdiagnostic peut être influencée par la valeur seuil d'APS utilisée, la fréquence du dépistage, l'âge du patient, le dosage d'APS divisé par le volume de la glande prostatique, le risque de contracter la maladie et le nombre d'échantillons de tissus (appelés carottes) prélevés lors de la biopsie. Les estimations peuvent aussi varier selon la méthode de calcul (c.-à-d. si le dénominateur utilisé est le nombre de patients soumis au dépistage, le nombre de patients ayant obtenu des résultats positifs au dosage de l'APS ou le nombre de patients ayant reçu un diagnostic de cancer de la prostate). Dans l'étude ERSPC, la prévalence estimée du surdiagnostic était de 40 à 56 % chez les hommes soumis au dépistage qui ont reçu un diagnostic de cancer de la prostate<sup>13</sup>.

## Bénéfices et préjudices associés au traitement

Deux études contrôlées randomisées<sup>27,28</sup> ont montré que la prostatectomie radicale réduisait la mortalité liée au cancer de la prostate chez les hommes atteints d'un cancer de la prostate symptomatique de stade précoce. Des études de cohortes ont rapporté que la prostatectomie radicale réduisait la mortalité liée au cancer de la prostate<sup>29–34</sup> et la mortalité toutes causes confondues<sup>29–36</sup>. Aucune donnée probante n'indiquait une amélioration des résultats cliniques avec la radiothérapie chez les hommes atteints du cancer de la prostate, bien que les analyses des don-

nées d'observation regroupées semblaient indiquer que la radiothérapie (seule ou en association avec une hormonothérapie) réduisait la mortalité liée au cancer de la prostate et la mortalité toutes causes confondues<sup>30–37</sup>. Aucune étude n'a montré une réduction de la mortalité toutes causes confondues ni de la mortalité liée au cancer de la prostate avec l'hormonothérapie, et aucune étude sur les effets de la cryothérapie ou des ultrasons focalisés de haute intensité sur la mortalité toutes causes confondues ou sur la mortalité liée au cancer de la prostate n'a été observée<sup>13</sup>.

La prostatectomie radicale, la radiothérapie et le traitement antiandrogénique sont les traitements les plus courants du cancer de la prostate et sont associés à des préjudices potentiels. Dans les études contrôlées randomisées comparant la prostatectomie radicale à l'attente vigilante, les hommes des 2 groupes pouvaient recevoir d'autres traitements, ce qui compliquait l'estimation des préjudices associés à un traitement particulier. Après 12,4 ans de suivi dans l'étude SPCG-4 (*Scandinavian Prostate Cancer Group-4*), la prévalence cumulative du dysfonctionnement érectile était de 84 % dans le groupe d'intervention et de 80 % dans le groupe d'attente vigilante; les taux d'incontinence urinaire étaient de 41 % et de 11 %, respectivement<sup>38</sup>. Après 2 ans de suivi dans l'étude PIVOT (*Prostate Cancer Intervention Versus Observation Trial*), les hommes ayant subi une prostatectomie radicale présentaient des taux plus élevés d'incontinence urinaire (17,1 % v. 6,3 %) et de dysfonctionnement érectile (81,1 % v.



44,1%) que les hommes du groupe d'observation<sup>28</sup>. Les études de cohortes ont démontré systématiquement un risque accru de dysfonctionnement érectile associé à la prostatectomie radicale (RR 1,6; IC à 95% de 1,3 à 1,8, touchant 23,4% des hommes ou 234 par 1000 hommes) comparativement à l'absence de traitement<sup>39-43</sup>. D'après les études contrôlées randomisées<sup>28,38</sup> et les études de cohortes<sup>39-42</sup>, la prostatectomie radicale a augmenté le risque d'incontinence urinaire comparativement à l'attente vigilante (méta-analyse des données d'études: RR 3,2; IC à 95% de 2,3 à 4,6; 17,8% des hommes ou 178 par 1000 hommes touchés<sup>13</sup>).

Par ailleurs, de 11 à 21% des hommes présenteront des complications postopératoires à court terme (< 30 jours), comme une infection, une intervention chirurgicale supplémentaire et des transfusions sanguines<sup>28,44-46</sup>. Des données d'essais cliniques indiquent que la radiothérapie augmente le risque d'incontinence urinaire<sup>47</sup> (non appuyé par les études d'observation<sup>13</sup>) et de dysfonctionnement érectile<sup>39-42</sup>. La radiothérapie en association avec l'hormonothérapie augmente aussi le risque de dysfonctionnement intestinal ou érectile<sup>13</sup>. Il a été démontré que l'hormonothérapie (traitement antiandrogénique) augmente le risque de dysfonctionnement érectile (76% v. 33% dans le groupe témoin), mais pas le risque d'incontinence urinaire (9% v. 6% dans le groupe témoin)<sup>13</sup>.

Les études retenues pour la revue systématique utilisaient diverses stratégies de suivi des participants témoins qui, souvent, n'étaient pas clairement définies<sup>13</sup>. En effet, on ignore quels groupes témoins (le cas échéant) ont fait l'objet d'un suivi actif (surveillance continue avec dosage répété de l'APS ainsi que biopsie et traitement selon les résultats de test obtenus<sup>48</sup>) ou d'une attente vigilante (pas de traitement actif; traitement des symptômes seulement en fonction de leur évolution<sup>48</sup>).

## Recommandations

Un résumé des recommandations se trouve dans l'encadré 2 et un résumé clinique se trouve à l'annexe 3 ([www.cmaj.ca/lookup/suppl/doi:10.1503/cmaj.140703/-/DC1](http://www.cmaj.ca/lookup/suppl/doi:10.1503/cmaj.140703/-/DC1)). Le Groupe d'étude cana-

### Encadré 2 : Résumé des recommandations pour les cliniciens et les responsables des politiques

Les recommandations s'appliquent à tous les hommes qui n'ont jamais reçu de diagnostic de cancer de la prostate.

- Pour les hommes de moins de 55 ans, nous recommandons de ne pas utiliser le dosage de l'antigène prostatique spécifique (APS) pour le dépistage du cancer de la prostate. (*Forte recommandation; données probantes de faible qualité*)
- Pour les hommes de 55 à 69 ans, nous recommandons de ne pas utiliser le dosage de l'APS pour le dépistage du cancer de la prostate. (*Recommandation faible; données probantes de qualité modérée*)
- Pour les hommes de 70 ans ou plus, nous recommandons de ne pas utiliser le dosage de l'APS pour le dépistage du cancer de la prostate. (*Forte recommandation; données probantes de faible qualité*)

dien a fondé ses recommandations sur l'équilibre global entre les possibles bénéfices et préjudices du dépistage par l'APS (avec ou sans toucher rectal), en soupesant les bénéfices et préjudices potentiels du diagnostic et du traitement précoces du cancer de la prostate. Voici les faits: (a) aucune donnée probante n'indique que le dépistage par l'APS réduit la mortalité globale chez les hommes de tout âge; (b) des données contradictoires suggèrent une réduction potentielle faible et incertaine de la mortalité liée au cancer de la prostate chez les hommes de 55 à 69 ans; (c) aucune donnée probante n'appuie la réduction de la mortalité liée au cancer de la prostate dans les autres groupes d'âge; et (d) des données probantes convergentes indiquent que le dépistage et le traitement actif entraînent des préjudices.

Les recommandations s'appliquent aux hommes de la population générale, dont ceux qui présentent des symptômes touchant les voies urinaires inférieures (p. ex., nycturie, miction impérieuse, mictions fréquentes et faible jet mictionnel) et ceux qui présentent une hypertrophie bénigne de la prostate. Environ 25% des hommes ayant participé aux études sur le dépistage présentaient des symptômes touchant les voies urinaires inférieures. Par ailleurs, l'hypertrophie bénigne de la prostate n'est pas un facteur de risque de cancer de la prostate<sup>49</sup>.

Les groupes à risque augmenté de cancer de la prostate et de décès des suites de la maladie sont notamment les hommes de race noire et les hommes ayant des antécédents familiaux de cancer de la prostate. Aucune donnée d'étude ne montre de disparités quant aux bénéfices ou aux préjudices associés au dépistage dans ces populations, comparativement aux hommes de la population générale. Cependant, les cliniciens devraient discuter des bénéfices et des préjudices associés au dépistage avec les hommes à risque augmenté de cancer de la prostate, en tenant explicitement compte de leurs valeurs et de leurs préférences.

Les recommandations ne s'appliquent pas à l'utilisation du dosage de l'APS aux fins de surveillance après un diagnostic ou un traitement du cancer de la prostate.

### Hommes de moins de 55 ans

*Pour les hommes de moins de 55 ans, nous recommandons de ne pas utiliser le dosage de l'APS pour le dépistage du cancer de la prostate. (Forte recommandation; données probantes de faible qualité)*

Cette recommandation repose sur la faible incidence de cancer de la prostate et de décès lié au cancer de la prostate et le manque de données probantes sur les bénéfices associés au dépistage dans ce groupe d'âge, ainsi que sur les données probantes sur les préjudices.

### Hommes de 55 à 69 ans

*Pour les hommes de 55 à 69 ans, nous recommandons de ne pas utiliser le dosage de l'APS pour le dépistage du cancer de la prostate. (Recommandation faible; données probantes de qualité modérée)*

Cette recommandation accorde relativement peu de valeur à une faible réduction potentielle de la mortalité liée au cancer de la prostate, et relativement plus de valeur au risque de résultats faux positifs, de biopsies inutiles, de surdiagnostic de cancer de

la prostate et de préjudices associés au traitement inutile de la maladie. Il faut discuter des risques et des bénéfices associés au dépistage par le dosage de l'APS et de ses conséquences éventuelles avec chaque patient en fonction de ses préférences. Les hommes qui accordent beaucoup de valeur à une faible réduction potentielle de la mortalité et qui se préoccupent moins des conséquences indésirables pourraient opter pour le dépistage.

### Hommes de 70 ans ou plus

*Pour les hommes de 70 ans ou plus, nous recommandons de ne pas utiliser le dosage de l'APS pour le dépistage du cancer de la prostate. (Forte recommandation; données probantes de faible qualité)*

Cette recommandation reflète une espérance de vie moindre et le manque de données probantes sur les bénéfices associés au dépistage dans ce groupe d'âge, ainsi que les données probantes sur les préjudices.

Pour les hommes de moins de 55 ans et les hommes de 70 ans ou plus, une forte recommandation contre le dépistage par le dosage de l'APS reflète notre certitude que les préjudices potentiels du dépistage l'emportent sur les bénéfices, compte tenu des connaissances actuelles.

## Considérations relatives à la mise en œuvre des recommandations

### Valeurs et préférences des patients

Vu les efforts récents déployés pour encourager le dépistage du cancer de la prostate, certains hommes souhaiteront peut-être subir le test de dépistage par le dosage de l'APS malgré les recommandations en vigueur. En effet, des données probantes révèlent que la susceptibilité perçue du patient à la maladie, à cause d'antécédents familiaux ou pour d'autres raisons, et la recommandation du médecin sont toutes deux associées à une demande de dosage de l'APS de la part du patient<sup>50</sup>. Malgré le manque de données probantes de qualité élevée sur la façon de favoriser la prise de décision éclairée quant au dépistage du cancer de la prostate, les discussions doivent viser à découvrir les connaissances, les préférences et les valeurs des patients qui se renseignent sur le dépistage par l'APS<sup>51,52</sup>. Beaucoup d'hommes ont une perception positive du dépistage, mais en ignorent les préjudices potentiels<sup>53</sup>. En plus de mettre l'accent sur les valeurs et les préférences d'un patient, la prise de décision éclairée demande aux praticiens d'établir une distinction entre les bénéfices et les préjudices associés au dépistage, à la prise en charge subséquente et au traitement, et de développer une vue d'ensemble des options diagnostiques et thérapeutiques lorsqu'on obtient un résultat anormal au dosage de l'APS.

Le Groupe d'étude canadien reconnaît que certains hommes peuvent accorder plus de valeur aux bénéfices potentiels du dépistage qu'aux préjudices et aux risques associés au diagnostic et au traitement de la maladie, et opter pour le dépistage par l'APS. Afin de favoriser la prise de décisions éclairées concernant le dépistage du cancer de la prostate, le Groupe d'étude canadien a mis au point des aides à la décision et des outils qui sont accessibles sur le site [www.canadiantaskforce.ca](http://www.canadiantaskforce.ca).

### Coûts

Le groupe de travail n'a pas tenu compte du coût du dépistage ni du traitement du cancer de la prostate dans la formulation de ces recommandations.

### Indicateurs de performance proposés

Les indicateurs de performance proposés sont les taux de dosage de l'APS et de suivi subséquent ainsi que le degré auquel les hommes qui font une demande de dépistage reçoivent une information précise sur les bénéfices et préjudices associés au dépistage (idéalement en utilisant une aide à la décision basée sur les données probantes). Les données sur l'incidence et la mortalité liées au cancer de la prostate doivent continuer de faire l'objet d'une surveillance aux paliers provincial, territorial et national.

### Autres lignes directrices

Les recommandations sur le dépistage d'autres organismes nationaux et internationaux sont présentées au tableau <sup>38,11,22,54-61</sup>. Les recommandations en vigueur sont conformes aux recommandations de 1994 du Groupe d'étude canadien sur les soins de santé préventifs et aux dernières lignes directrices du Preventive Services Task Force des États-Unis<sup>8</sup> et de Cancer Council Australia<sup>61</sup>. Le National Health Service au Royaume-Uni n'a pas établi de programme de dépistage, mais il suggère aux hommes qui s'inquiètent du risque de cancer de la prostate d'obtenir des renseignements clairs et objectifs sur les bénéfices et les préjudices associés au dosage de l'APS et aux traitements contre le cancer de la prostate<sup>57</sup>.

### Autres tests de dépistage

Plusieurs tests complémentaires au test de dépistage du cancer de la prostate par le dosage de l'APS ont été mis au point au cours des dernières années. Ils visent à détecter l'activité cellulaire dans les cellules potentiellement malignes et cherchent à évaluer le risque à divers stades, notamment après l'obtention d'un résultat positif à la biopsie<sup>62</sup>, après l'obtention d'un résultat négatif à la biopsie<sup>63-65</sup>, et après la chirurgie<sup>66</sup>. Ces tests mesurent des marqueurs moléculaires qui révèlent généralement des schémas d'activité génique, comme l'expression du gène *PCA3* et d'autres mutations de l'ADN, en présence d'une tumeur maligne. Nous recommandons de ne pas utiliser ces tests avant qu'il y ait suffisamment de données probantes sur leur efficacité diagnostique, et sur les préjudices et les bénéfices qui leur sont associés.

### Lacunes dans les connaissances

Les recherches futures devraient viser à trouver des solutions de rechange au dépistage du cancer de la prostate par le dosage de l'APS et à réduire le dosage inapproprié de l'APS. Il a été suggéré que le dosage initial de l'APS permettrait d'évaluer le risque futur de décès ou de métastases liés au cancer de la prostate (ce qui appuierait le dosage en fonction du risque<sup>67,68</sup>), mais d'autres travaux s'imposent avant de pouvoir recommander une telle démarche. L'imagerie par résonance magnétique et des règles encadrant la décision clinique sont des mesures prometteuses

**Tableau 3 : Résumé des recommandations canadiennes et étrangères sur le dépistage du cancer de la prostate par le dosage de l'APS**

| Organisme                                                                                    | Âge au début du dépistage par le dosage de l'APS                                                                                                                                                                                                                                                                                                                                                        | Intervalle de dépistage                                            | Âge à l'abandon du dépistage par le dosage de l'APS                                |
|----------------------------------------------------------------------------------------------|---------------------------------------------------------------------------------------------------------------------------------------------------------------------------------------------------------------------------------------------------------------------------------------------------------------------------------------------------------------------------------------------------------|--------------------------------------------------------------------|------------------------------------------------------------------------------------|
| Groupe d'étude canadien sur les soins de santé préventifs (en vigueur)                       | Dépistage systématique par le dosage de l'APS non recommandé                                                                                                                                                                                                                                                                                                                                            |                                                                    |                                                                                    |
| Groupe d'étude canadien sur l'examen médical périodique (1994) <sup>11</sup>                 | Dépistage systématique par le dosage de l'APS non recommandé dans le cadre de l'examen médical périodique                                                                                                                                                                                                                                                                                               |                                                                    |                                                                                    |
| US Preventive Services Task Force (2012) <sup>8</sup>                                        | Dépistage par le dosage de l'APS non recommandé; s'applique aux hommes de tout âge                                                                                                                                                                                                                                                                                                                      |                                                                    |                                                                                    |
| Association des urologues du Canada (2011) <sup>54</sup>                                     | <ul style="list-style-type: none"> <li>Risque moyen : offert aux hommes de 50 ans dont l'espérance de vie est d'au moins 10 ans</li> <li>Risque accru (p. ex. antécédents familiaux de cancer de la prostate, origine africaine) : offert aux hommes de 40 ans et plus</li> <li>Dosage initial de l'APS chez les hommes de 40 à 49 ans pour établir le risque futur de cancer de la prostate</li> </ul> | Non précisé                                                        | 75 ans                                                                             |
| Société canadienne du cancer (2014) <sup>55</sup>                                            | Les hommes de plus de 50 ans doivent demander à leur médecin s'ils devraient subir un test de dépistage du cancer de la prostate                                                                                                                                                                                                                                                                        | Non précisé                                                        | Non précisé                                                                        |
| American Cancer Society (2012) <sup>56</sup>                                                 | <ul style="list-style-type: none"> <li>Risque moyen : discussion à 50 ans</li> <li>Risque accru : discussion à 40 ou 45 ans, selon le niveau de risque</li> </ul>                                                                                                                                                                                                                                       | APS < 2,5 ng/mL : tous les 2 ans<br>APS ≥ 2,5 ng/mL : tous les ans | Espérance de vie < 10 ans                                                          |
| National Cancer Institute (2012) <sup>22</sup>                                               | Données probantes insuffisantes pour déterminer si le dosage de l'APS ou le toucher rectal permettent de réduire la mortalité liée au cancer de la prostate                                                                                                                                                                                                                                             |                                                                    |                                                                                    |
| National Health Service (2013) <sup>57</sup>                                                 | Aucun program de dépistage organisé; program de choix éclairé = les hommes s'inquiétant du risque de cancer de la prostate reçoivent des renseignements clairs et objectifs sur les avantages et les désavantages du dosage de l'APS et du traitement du cancer                                                                                                                                         |                                                                    |                                                                                    |
| Cancer de la Prostate Canada (2013) <sup>58</sup>                                            | <ul style="list-style-type: none"> <li>Dosage initial de l'APS offert aux hommes de 40 à 49 ans</li> <li>Les hommes de plus de 40 ans doivent discuter du dépistage précoce avec leur médecin.</li> <li>Les hommes à risque élevé doivent discuter du cancer de la prostate avant 40 ans avec un professionnel en soins primaires prostate avant 40 ans.</li> </ul>                                     | Non précisé                                                        | ≥ 70 ans; la décision doit être fondée sur les facteurs individuels (non précisés) |
| American Urological Association (2013) <sup>59</sup>                                         | <ul style="list-style-type: none"> <li>Dépistage systématique non recommandé pour les hommes de 40 à 54 ans à risque moyen</li> <li>Prise de décision partagée recommandée pour les hommes de 55 à 69 ans; la décision de procéder au dépistage repose sur les valeurs et les préférences du patient.</li> </ul>                                                                                        | ≥ 2 ans                                                            | ≥ 70 ans ou espérance de vie < 10 à 15 ans                                         |
| American College of Physicians (2013) <sup>60</sup>                                          | Hommes de 50 à 69 ans : les cliniciens doivent discuter des bénéfices limités et des préjudices substantiels associés au dépistage du cancer de la prostate; ils ne doivent pas utiliser le dosage de l'APS chez les patients qui n'ont pas exprimé clairement leur préférence à cet égard.                                                                                                             | Non précisé                                                        | ≥ 70 ans ou espérance de vie < 10 à 15 ans                                         |
| Cancer Council Australia, Australian Health Ministers' Advisory Council (2010) <sup>61</sup> | Le dosage de l'APS ne convient pas au dépistage pour la population générale.                                                                                                                                                                                                                                                                                                                            |                                                                    |                                                                                    |

Remarque: APS = antigène prostatique spécifique.

quant à l'amélioration du rapport préjudices–bénéfices associés au dépistage, mais elles n'ont pas été mises à l'épreuve dans le cadre d'études randomisées rigoureuses. Les recherches futures devraient également servir à élaborer des méthodes permettant d'identifier

un sous-groupe d'hommes atteints du cancer de la prostate qui présenteraient une évolution cliniquement significative de la maladie (en l'absence de traitement). Le fait de modifier les valeurs seuil d'APS ou les intervalles de dépistage et de dissocier le dépistage du



traitement (puisque certains hommes peuvent opter pour l'attente vigilante ou la surveillance active au lieu d'un traitement actif) pourrait changer favorablement le rapport préjudices-bénéfices du dépistage par le dosage de l'APS. Cependant, il faut pousser les recherches pour tester cette hypothèse. Des études évaluant les bénéfices associés au dépistage par le dosage de l'APS chez les hommes ayant des antécédents familiaux de cancer de la prostate ou les hommes de race noire seraient utiles pour déterminer si le dépistage est justifié dans ces populations à risque élevé. Enfin, des études randomisées devraient comparer l'attente vigilante ou la surveillance active, ou les deux, au traitement à visée curative.

## Conclusion

Les données probantes disponibles ne montrent pas de façon concluante que le dépistage par le dosage de l'APS réduit la mortalité liée au cancer de la prostate, mais indiquent clairement une augmentation du risque de préjudices. Le Groupe d'étude canadien recommande de ne pas utiliser le dosage de l'APS pour le dépistage du cancer de la prostate. Les recommandations fortes contre le dépistage chez les hommes de moins de 55 ans ou de 70 ans ou plus impliquent que les cliniciens ne doivent pas discuter du dépistage de façon systématique avec les patients de ces groupes d'âge à moins que ces derniers abordent eux-mêmes le sujet. La recommandation faible contre le dépistage chez les hommes de 55 à 69 ans signifie que si un clinicien croit que le patient accorde beaucoup de valeur à un bénéfice potentiel faible associé au dépistage et est moins préoccupé par les préjudices, il devrait discuter avec lui des bénéfices et des préjudices associés au dépistage afin que le patient puisse prendre une décision éclairée à cet effet. Toute utilisation du test de dépistage du cancer de la prostate par l'APS exige une discussion réfléchie entre le clinicien et le patient sur l'équilibre entre des bénéfices incertains et des préjudices substantiels.

## Références

- Comité directeur des statistiques sur le cancer de la Société canadienne du cancer. *Statistiques canadiennes sur le cancer 2013*. Toronto: Société canadienne du cancer, 2013. ISSN 0835-2976.
- Statistiques canadiennes sur le cancer 2011* [tableau 6.1]. Toronto, Société canadienne du cancer, 2011. Accessible : [www.cancer.ca/~media/cancer.ca/CW/cancer%20information/cancer%20101/Canadian%20cancer%20statistics/Canadian-Cancer-Statistics-2011-FR.pdf](http://www.cancer.ca/~media/cancer.ca/CW/cancer%20information/cancer%20101/Canadian%20cancer%20statistics/Canadian-Cancer-Statistics-2011-FR.pdf) (consulté le 22 septembre 2014).
- Powell IJ, Bock CH, Ruterbusch JJ, et al. Evidence supports a faster growth rate and/or earlier transformation to clinically significant prostate cancer in black than in white American men, and influences racial progression and mortality disparity. *J Urol* 2010;183:1792-6.
- Etzioni R, Penson DF, Legler JM, et al. Overdiagnosis due to prostate-specific antigen screening: lessons from the US prostate cancer incidence trends. *J Natl Cancer Inst* 2002;94:981-90.
- Bangma CH, Roemeling S, Schroder FH. Overdiagnosis and overtreatment of early detected prostate cancer. *World J Urol* 2007;25:3-9.
- Brawley OW. Prostate cancer screening: What we know, don't know, and believe. *Ann Intern Med* 2012;157:135-6.
- Schröder FH, Roobol MJ. Prostate cancer epidemic in sight? *Eur Urol* 2012;61:1093-5.
- Moyer VA; US Preventive Services Task Force. Screening for prostate cancer: US Preventive Services Task Force recommendation statement. *Ann Intern Med* 2012;157:120-34.
- Perron L, Moore L, Bairati I, et al. PSA screening and prostate cancer mortality. *CMAJ* 2002;166:586-91.
- Center MM, Jemal A, Lortet-Tierulent J, et al. International variation in prostate cancer incidence and mortality rates. *Eur Urol* 2012;61:1079-92.
- Groupe d'étude canadien sur l'examen médical périodique. Dépistage du cancer de la prostate. Dans: *Guide canadien de médecine clinique préventive*. Ottawa, Groupe Communication Canada; 1994:915.
- Connor Gorber S, Singh H, Pottie K, et al. Process for guideline development by the reconstituted Canadian Task Force on Preventive Health Care. *CMAJ* 2012;184:1575-81.
- Dunfield L, Usman A, Fitzpatrick-Lewis D, et al., rédacteurs. *Screening for prostate cancer with prostate-specific antigen (PSA) and treatment of early-stage or screen-detected prostate cancer: a systematic review of the clinical benefits and harms*. Ottawa: Groupe d'étude canadien sur les soins de santé préventifs, 2013.
- Groupe d'étude canadien sur les soins de santé préventifs. *Procedure Manual*. Ottawa: Groupe d'étude canadien sur les soins de santé préventifs, 2014.
- Schünemann H, Brozek J, Oxman A. *GRADE handbook for grading quality of evidence and strength of recommendations*. Version 3.2 [mise à jour en mars 2009]. GRADE Working Group; 2009.
- Kjellman A, Akre O, Norming U, et al. 15-year follow-up of a population based prostate cancer screening study. *J Urol* 2009;181:1615-21.
- Sandblom G, Varenhorst E, Rosell J, et al. Randomised prostate cancer screening trial: 20 year follow-up. *BMJ* 2011;342:d1539.
- Labrie F, Candas B, Cusan L, et al. Screening decreases prostate cancer mortality: 11-year follow-up of the 1988 Quebec prospective randomized controlled trial. *Prostate* 2004;59:311-8.
- Schröder FH, Hugosson J, Roobol MJ, et al. Screening and prostate cancer mortality: results of the European Randomised Study of Screening for Prostate Cancer (ERSPC) at 13 years of follow-up. *Lancet* 2014;384:2027-35.
- Hugosson J, Carlsson S, Aus G, et al. Mortality results from the Göteborg randomised population-based prostate-cancer screening trial. *Lancet Oncol* 2010;11:725-32.
- Andriole GL, Crawford ED, Grubb RL III, et al. Prostate cancer screening in the randomized Prostate, Lung, Colorectal and Ovarian cancer screening trial: mortality results after 13 years of follow-up. *J Natl Cancer Inst* 2012;104:125-32.
- Prostate cancer screening (PDQ). Bethesda (MD): National Cancer Institute; 2014. Accessible : [www.cancer.gov/cancertopics/pdq/screening/prostate/HealthProfessional/page1](http://www.cancer.gov/cancertopics/pdq/screening/prostate/HealthProfessional/page1) (consulté le 9 septembre 2014).
- Croswell JM, Kramer BS, Kreimer AR, et al. Cumulative incidence of false-positive results in repeated, multimodal cancer screening. *Ann Fam Med* 2009;7:212-22.
- Kilpeläinen TP, Tammela TL, Roobol M, et al. False-positive screening results in the European Randomized Study of Screening for Prostate Cancer. *Eur J Cancer* 2011;47:2698-705.
- Thompson IM, Pauler DK, Goodman PJ, et al. Prevalence of prostate cancer among men with a prostate-specific antigen level <math>\leq 4.0</math> ng per milliliter. *N Engl J Med* 2004;350:2239-46.
- Thompson IM, Goodman PJ, Tangen CM, et al. The influence of finasteride on the development of prostate cancer. *N Engl J Med* 2003;349:215-24.
- Bill-Axelsson A, Holmberg L, Ruutu M, et al. Radical prostatectomy versus watchful waiting in early prostate cancer. *N Engl J Med* 2011;364:1708-17.
- Wilt TJ, Brawer MK, Jones KM, et al. Radical prostatectomy versus observation for localized prostate cancer. *N Engl J Med* 2012;367:203-13.
- Abdollah F, Sun M, Schmitges J, et al. Cancer-specific and other-cause mortality after radical prostatectomy versus observation in patients with prostate cancer: competing-risks analysis of a large North American population-based cohort. *Eur Urol* 2011;60:920-30.
- Albertsen PC, Hanley JA, Penson DF, et al. 13-year outcomes following treatment for clinically localized prostate cancer in a population based cohort. *J Urol* 2007;177:932-6.
- Merglen A, Schmidlin F, Fioretta G, et al. Short- and long-term mortality with localized prostate cancer. *Arch Intern Med* 2007;167:1944-50.
- Stattin P, Holmberg E, Johansson JE, et al. Outcomes in localized prostate cancer: National Prostate Cancer Register of Sweden follow-up study. *J Natl Cancer Inst* 2010;102:950-8.
- Tewari A, Divine G, Chang P, et al. Long-term survival in men with high grade prostate cancer: a comparison between conservative treatment, radiation therapy and radical prostatectomy — a propensity scoring approach. *J Urol* 2007;177:911-5.
- Zhou EH, Ellis RJ, Cherullo E, et al. Radiotherapy and survival in prostate cancer patients: a population-based study. *Int J Radiat Oncol Biol Phys* 2009;73:15-23.
- Wong YN, Mitra N, Hudes G, et al. Survival associated with treatment vs observation of localized prostate cancer in elderly men. *JAMA* 2006;296:2683-93.
- Schymura MJ, Kahn AR, German RR, et al. Factors associated with initial treatment and survival for clinically localized prostate cancer: results from the CDC-NPCR Patterns of Care Study (PoC1). *BMC Cancer* 2010;10:152.
- Abdollah F, Sun M, Schmitges J, et al. Competing-risks mortality after radiotherapy vs. observation for localized prostate cancer: a population-based study. *Int J Radiat Oncol Biol Phys* 2012;84:95-103.
- Johansson E, Steineck G, Holmberg L, et al. Long-term quality-of-life outcomes after radical prostatectomy or watchful waiting: the Scandinavian Prostate Cancer Group-4 randomised trial. *Lancet Oncol* 2011;12:891-9.
- Hoffman RM, Hunt WC, Gilliland FD, et al. Patient satisfaction with treatment decisions for clinically localized prostate carcinoma: results from the prostate cancer outcomes study. *Cancer* 2003;97:1653-62.

40. Litwin MS. Health-related quality of life after treatment for localized prostate cancer. *Cancer* 1995;75:2000-3.
41. Schapira MM, Lawrence WF, Katz DA, et al. Effect of treatment on quality of life among men with clinically localized prostate cancer. *Med Care* 2001;39:243-53.
42. Smith DP, King MT, Egger S, et al. Quality of life three years after diagnosis of localised prostate cancer: population based cohort study. *BMJ* 2009;339:b4817.
43. Siegel T, Moul JW, Spevak M, et al. The development of erectile dysfunction in men treated for prostate cancer. *J Urol* 2001;165:430-5.
44. Alibhai SM, Leach M, Tomlinson G, et al. 30-day mortality and major complications after radical prostatectomy: influence of age and comorbidity. *J Natl Cancer Inst* 2005;97:1525-32.
45. Augustin H, Hammerer P, Graefen M, et al. Intraoperative and perioperative morbidity of contemporary radical retropubic prostatectomy in a consecutive series of 1243 patients: results of a single center between 1999 and 2002. *Eur Urol* 2003;43:113-8.
46. Rabbani F, Yunis LH, Pinochet R, et al. Comprehensive standardized report of complications of retropubic and laparoscopic radical prostatectomy. *Eur Urol* 2010;57:371-86.
47. Fransson P, Damber JE, Tomic R, et al. Quality of life and symptoms in a randomized trial of radiotherapy versus deferred treatment of localized prostate carcinoma. *Cancer* 2001;92:3111-9.
48. Surveillance active. Toronto: Cancer de la Prostate Canada; 2013. Accessible : <http://prostatecancer.ca/Prostate-Cancer/Treatment/Active-Surveillance#.Uysm3qhdv8E> (consulté le 9 septembre 2014).
49. Facteurs de risque du cancer de la prostate. Toronto, Société canadienne du cancer. Accessible : <http://www.cancer.ca/fr-ca/cancer-information/cancer-type/prostate/risks/?region=qc> (consulté le 9 septembre 2014).
50. Vedel I, Puts MTE, Monette M, et al. The decision-making process in prostate cancer screening in primary care with a prostate-specific antigen: a systematic review. *J Geriatr Oncol* 2011;2:161-76.
51. Mulley AG, Trimble C, Elwyn G. Stop the silent misdiagnosis: patients' preferences matter. *BMJ* 2012;345:e6572.
52. Welch HG, Black WC. Overdiagnosis in cancer. *J Natl Cancer Inst* 2010;102:605-13.
53. Smith SD, Birtwhistle R. Exploring patient perceptions of PSA screening for prostate cancer: risks, effectiveness, and importance. *Can Fam Physician* 2012;58:e502-7.
54. Izawa JI, Klotz L, Siemens DR, et al. Prostate cancer screening: Canadian guidelines 2011. *Can Urol Assoc J* 2011;5:235.
55. Test de l'antigène prostatique spécifique (APS). Toronto: Société canadienne du cancer, 2014. Accessible : <http://www.cancer.ca/fr-ca/cancer-information/diagnosis-and-treatment/tests-and-procedures/prostate-specific-antigen-apsa/?region=on> (consulté le 9 septembre 2014).
56. *American Cancer Society recommendations for prostate cancer early detection*. Atlanta: American Cancer Society; 2012. Accessible : [www.cancer.org/cancer/prostatecancer/moreinformation/prostatecancerearlydetection/prostate-cancer-early-detection-acs-recommendations](http://www.cancer.org/cancer/prostatecancer/moreinformation/prostatecancerearlydetection/prostate-cancer-early-detection-acs-recommendations) (consulté le 1<sup>er</sup> novembre 2012).
57. *Prostate Cancer Risk Management Programme*. Londres (Royaume-Uni): National Health Service; 2013. Accessible : [www.cancerscreening.nhs.uk/prostate/index.html](http://www.cancerscreening.nhs.uk/prostate/index.html) (consulté le 9 septembre 2014).
58. *Cancer de la Prostate Canada — recommandation concernant l'APS: Connaissiez votre taux*. Toronto: Cancer de la Prostate Canada; 2013. Accessible : [http://prostatecancer.ca/getmedia/f6869484-ac59-4f0a-b3c3-e4072d6da898/PCC-PSA-Position-Know-Your-Number-final\\_FR-rev1-2.pdf.aspx](http://prostatecancer.ca/getmedia/f6869484-ac59-4f0a-b3c3-e4072d6da898/PCC-PSA-Position-Know-Your-Number-final_FR-rev1-2.pdf.aspx) (consulté le 9 septembre 2014).
59. Ballentine Carter H, Albertsen PC, Barry MJ, et al. *Early detection of prostate cancer: AUA guideline*. Linthicum (MD): American Urological Association; 2013. Accessible : [www.auanet.org/common/pdf/education/clinical-guidance/Prostate-Cancer-Detection.pdf](http://www.auanet.org/common/pdf/education/clinical-guidance/Prostate-Cancer-Detection.pdf) (consulté le 9 septembre 2014).
60. Qaseem A, Barry MJ, Denberg TD, et al.; Clinical Guidelines Committee of the American College of Physicians. Screening for prostate cancer: a guidance statement from the Clinical Guidelines Committee of the American College of Physicians. *Ann Intern Med* 2013;158:761-9.
61. *Position statement. Prostate cancer screening in Australia: joint key messages*. Sydney (Australie): Cancer Council Australia; 2010. Accessible : [www.cancer.org.au/content/pdf/CancerControlPolicy/PositionStatements/PS-Prostate\\_Cancer\\_Screening\\_Joint\\_key\\_messages\\_%20published\\_May2010.pdf](http://www.cancer.org.au/content/pdf/CancerControlPolicy/PositionStatements/PS-Prostate_Cancer_Screening_Joint_key_messages_%20published_May2010.pdf) (consulté le 9 septembre 2014).
62. Cain C. Prostate's PTEN diagnosis. *SciBX* 2011;4(9).
63. Ramos CG, Valdevenito R, Vergara I, et al. PCA3 sensitivity and specificity for prostate cancer detection in patients with abnormal PSA and/or suspicious digital rectal examination: first Latin American experience. *Urol Oncol* 2013;31:1522-6.
64. Mitomics launches flagship product – Prostate Core Mitomic Test™ [communiqué de presse]. Mitomics Inc.; 31 mars 2011. Accessible : [www.mitomics.com/media-center/press-detail.php?id=8](http://www.mitomics.com/media-center/press-detail.php?id=8) (consulté le 9 septembre 2014).
65. MDxHealth announces results from the ConfirmMDx(TM) for prostate cancer test studies presented at the 2013 ASCO Genito-urinary Cancers Symposium [communiqué de presse]. MDxHealth; 18 février 2013. Accessible : [www.mdxhealth.com/news-and-events/press-releases-and-events?detail=1678617](http://www.mdxhealth.com/news-and-events/press-releases-and-events?detail=1678617) (consulté le 9 septembre 2014).
66. Moul JW, Lilja H, Semmes OJ, et al. NADiA ProVue prostate-specific antigen slope is an independent prognostic marker for identifying men at reduced risk of clinical recurrent of prostate cancer after radical prostatectomy. *Urology* 2012;80:1319-25.
67. Lilja H, Cronin AM, Dahlin A, et al. Prediction of significant prostate cancer diagnosed 20 to 30 years later with a single measure of prostate-specific antigen at or before age 50. *Cancer* 2011;117:1210-9.
68. Vickers AJ, Ulmert D, Sjoberg DD, et al. Strategy for detection of prostate cancer based on relation between prostate specific antigen at age 40–55 and long term risk of metastasis: case-control study. *BMJ* 2013;346:f2023.

**Intérêts concurrents :** Aucun des auteurs (membres du groupe de rédaction des lignes directrices) n'a signalé d'intérêts concurrents.

Cet article a été revu par les pairs.

**Liste des auteurs des lignes directrices :** Neil Bell, Sarah Connor Gorber, Amanda Shane, Michel Joffres, Harminder Singh, James Dickinson, Elizabeth Shaw, Lesley Dunfield et Marcello Tonelli.

**Affiliations :** Département de médecine familiale (Bell), Université de l'Alberta, Edmonton, Alta.; Agence de la santé publique du Canada (Connor Gorber, Shane, Dunfield), Ottawa, Ont.; Faculté des sciences de la santé (Joffres), Université Simon Fraser, Burnaby, BC; départements de médecine interne et des sciences de la santé communautaire (Singh), Université du Manitoba, Winnipeg, Man.; départements de médecine familiale et des sciences de la santé communautaire (Dickinson) et bureau du doyen adjoint — recherche (Tonelli), Université de Calgary, Calgary, Alta.; département de médecine familiale (Shaw), Université McMaster, Hamilton, Ont.

**Collaborateurs :** Neil Bell, Sarah Connor Gorber, Amanda Shane, James Dickinson, Lesley Dunfield et Marcello Tonelli ont contribué substantiellement à la conception et au plan de l'article ainsi qu'à l'analyse et à l'interprétation des données probantes, et ont rédigé la version préliminaire du document. Michel Joffres a contribué à l'analyse et à l'interprétation des données et a révisé la version préliminaire. Harminder Singh et Elizabeth Shaw ont contribué à l'interprétation des données et ont révisé la version préliminaire. Tous les auteurs ont approuvé la version finale du document et se portent garants du travail.

**Financement :** Le Groupe d'étude canadien sur les soins de santé préventifs est financé par l'Agence de la santé publique du Canada et les Instituts de recherche en santé du Canada. Le point de vue des organismes de financement n'a pas influé sur le contenu des lignes directrices; les situations d'intérêts concurrents ont été notées et résolues. Les points de vue exprimés dans cet article sont ceux des auteurs et ne représentent pas celui de l'Agence de la santé publique du Canada.

**Remerciements :** Les auteurs remercient Ali Usman et Donna Fitzpatrick-Lewis, membres de l'équipe de recherche des Centres d'analyse et de synthèse des données probantes, d'avoir fait la revue systématique sur lequel ces recommandations sont fondées, l'équipe de la Division des lignes directrices en prévention et de la Division de surveillance de la santé et de l'épidémiologie de l'Agence de la santé publique du Canada; et les pairs examinateurs, dont les judicieux conseils ont permis d'améliorer la qualité du présent document (Kami Kandola, représentante du Conseil des médecins hygiénistes en chef; Scott D. Smith, Collège des médecins de famille du Canada; Anthony B. Miller, Dalla Lana School of Public Health, Université de Toronto; Chris Del Mar, Université Bond; Robert Nuttall, Société canadienne du cancer; Barbara Foster, Santé Canada; Amanda Shaw, Agence de la santé publique du Canada; et Alexandra Barratt, School of Public Health, Université de Sydney).

**Correspondance :** Groupe d'étude canadien sur les soins de santé préventifs, info@canadiantaskforce.ca
